1 **Survival and ice nucleation activity of *Pseudomonas syringae* strains exposed to**  
2 **simulated high-altitude atmospheric conditions**

3 Gabriel Guarany de Araujo<sup>a</sup>, Fabio Rodrigues<sup>b</sup>, Fabio Luiz Teixeira Gonçalves<sup>c</sup>, Douglas  
4 Galante<sup>d,\*</sup>

5 <sup>a</sup> Interunities Graduate Program in Biotechnology, University of São Paulo, Brazil

6 <sup>b</sup> Department of Fundamental Chemistry, Institute of Chemistry, University of São Paulo,  
7 Brazil

8 <sup>c</sup> Department of Atmospheric Sciences, Institute of Astronomy, Geophysics and  
9 Atmospheric Sciences, University of São Paulo, Brazil

10 <sup>d</sup> Brazilian Synchrotron Light Laboratory, Brazilian Center for Research in Energy and  
11 Materials, Brazil

12 \* Corresponding author. Brazilian Synchrotron Light Laboratory, Av. Giuseppe Máximo  
13 Scolfaro, 10000, CEP 13083-100, Campinas, São Paulo, Brazil, Tel.: +551935175081; Fax:  
14 +551935121004. E-mail address: douglas.galante@lnls.br

15 **Running title:** Survival of ice nucleating bacteria on the atmosphere

16 **ABSTRACT**

17 The epiphytic bacterium *Pseudomonas syringae* produces the most efficient and  
18 well-studied biological ice nuclei (IN) known. Bioaerosols containing these cells have been  
19 proposed to influence cloud glaciation, an important process in the initiation of  
20 precipitation. The presence of this species has been reported on rain, snow, and cloud water

21 samples, but how these organisms can survive the harsh conditions present on the high  
22 atmosphere still remains to be better understood. In this study, the impact caused by this  
23 type of environment on *P. syringae* was assayed by measuring their viability and IN  
24 activity. Two strains, of the pathovars *syringae* and *garcae*, were compared to *Escherichia*  
25 *coli*. While UV-C radiation effectively inactivated these cells, the *Pseudomonas* were much  
26 more tolerant to UV-B. The *P. syringae* strains were also more resistant to “environmental”  
27 UV radiation from a solar simulator, composed of UV-A and UV-B. The response of their  
28 IN after long exposures to this radiation varied: only one strain suffered a relatively small  
29 10-fold reduction in IN activity at -5 °C. Desiccation at different relative humidity values  
30 also affected the IN, but some activity at -5 °C was still maintained for all tests. The  
31 pathovar *garcae* tended to be more resistant to the stress treatments than the pathovar  
32 *syringae*, particularly to desiccation, though its IN were found to be more sensitive.  
33 Compared to *E. coli*, the *P. syringae* strains seemed relatively better adapted to survival  
34 under conditions present on the atmosphere at high altitudes.

## 35 **IMPORTANCE**

36 The plant-associated bacterium *Pseudomonas syringae* produces on its outer  
37 membrane highly efficient ice nuclei which are able to induce the freezing of supercooled  
38 water. This ability has been linked to increased frost damaged on colonized leaves and also  
39 to the formation of ice in clouds, an important process leading to precipitation. *P. syringae*  
40 has been found on rain, snow, and cloud water samples, confirming its presence on the  
41 atmosphere. This study aimed to assess the survival of these cells and the maintenance of  
42 their ice nucleation activity under stressing conditions present in high altitudes: ultraviolet  
43 radiation and desiccation. *P. syringae* strains were shown to at least partially tolerate these

44 factors, and their most efficient ice nuclei, while affected, could still be detected after all  
45 experiments.

46 **Key words:** *Pseudomonas syringae*. Ice nucleation. Ultraviolet radiation. Desiccation.  
47 High atmosphere.

## 48 INTRODUCTION

49 The Gram-negative bacterium *Pseudomonas syringae* is a common member of  
50 epiphytic communities and an important phytopathogen in diverse crops (Hirano and  
51 Upper, 2000). It was the first organism found to produce biological ice nuclei (IN) of  
52 exceptional efficiency, being able to freeze supercooled water at temperatures above -10 °C  
53 (Maki *et al.*, 1974). The IN activity of this organism originates from a large protein (called  
54 InaZ) situated at the cell's outer membrane, which forms multimeric clusters that structure  
55 water into an ice-like array, promoting its phase change (Green and Warren, 1985;  
56 Govindarajan and Lindow, 1988). This trait has been linked to the increased susceptibility  
57 to frost damage above -5 °C of plants harboring populations of these bacteria on their  
58 leaves (Lindow *et al.*, 1982).

59 This particular IN ability of *P. syringae* and similar bacteria has been long  
60 suggested to possibly influence atmospheric processes (Sands *et al.*, 1982; Morris *et al.*,  
61 2014). The freezing of the droplets that compose clouds (glaciation) is an important  
62 mechanism leading to precipitation (including hail formation), and is largely determined by  
63 IN particles present in suspension on the air. Due to the reduced vapor pressure over ice  
64 crystals than supercooled liquid water, frozen particles can accumulate humidity and grow  
65 to sizes large enough to start the precipitation process inside the cloud (Möhler *et al.*, 2007;

66 Murray *et al.*, 2012). This is known as the Wegener-Bergeron-Findeisen process, and its  
67 significance is evidenced by observations such as that the ice phase of clouds is the main  
68 source of rain in continental areas across the globe (Mülmenstädt *et al.*, 2015). An  
69 additional mechanism that can amplify the influence of IN is the Hallett-Mossop process,  
70 the rapid multiplication by orders of magnitude of secondary ice crystal fragments caused  
71 by the riming and splintering of primary ice surfaces (Hallett and Mossop, 1974). Since this  
72 occurs predominantly between -3 and -8 °C, temperatures where biological IN are the  
73 major active nuclei present in the environment (Murray *et al.*, 2012), this has been  
74 proposed as another potential contribution that organisms like *P. syringae* can have for the  
75 precipitation cycle (Morris *et al.*, 2014).

76 In addition to cloud glaciation, microbial cells can also exhibit activity as cloud  
77 condensation nuclei (CCN) in warm clouds (Bauer *et al.*, 2003). These aerosol particles are  
78 essential for the condensation of water vapor into the liquid droplets that make up clouds.  
79 Interestingly, besides their IN activity, studies with bacteria of the *Pseudomonas* genus  
80 have also shown their ability to produce biosurfactants that can act as highly efficient CCN  
81 (Ahern *et al.*, 2007; Ekström *et al.*, 2010; Renard *et al.*, 2016). Further research of  
82 microbial life in clouds also includes the effects of cells on clouds chemistry, particularly in  
83 relation to the metabolism of organic compounds in its aqueous phase (Delort *et al.*, 2017).

84 Multiple works have reported the presence of cultivable *P. syringae* and other ice  
85 nucleating bacteria in rain and snow samples (Morris *et al.*, 2008; Šantl-Temkiv *et al.*,  
86 2015, for example). Stopelli *et al.* (2017) isolated IN-active *P. syringae* with selective  
87 culture media from snow collected at an altitude of 3580 m at Jungfrauoch, Switzerland.  
88 These organisms have also been isolated directly from clouds (Amato *et al.*, 2007; Joly *et*

89 *al.*, 2013). Members of the *Pseudomonas* genus were the most frequently identified  
90 bacterial isolates from cloud water samples collected at the puy de Dôme summit in France  
91 (at an altitude of 1465 m) between 2007 and 2010 (Vaïtilingom *et al.*, 2012). A number of  
92 *Pseudomonas* strains were also isolated from clouds and rain at the Outer Hebrides,  
93 Scotland, although those did not present IN activity (Ahern *et al.*, 2007). These evidences  
94 point to the widespread distribution of these bacteria on the atmosphere and support their  
95 relationship with clouds and the precipitation cycle.

96 Besides *Pseudomonas*, a concentration of about  $10^4$  bacterial cells per cubic meter is  
97 estimated to be found typically over land, though this number may significantly change  
98 with the altitude, weather, season, and the underlying ecosystem (Bauer *et al.*, 2002;  
99 Burrows *et al.*, 2009). Particles the size of bacterial cells have a relatively long residence  
100 time on the air, on the order of days, during which they have the potential to cross long  
101 distances (Burrows *et al.*, 2009; Wilkinson *et al.*, 2012). Effective dispersal through this  
102 medium is, however, conditioned to cell survival as aerosols, which is a considerable  
103 challenge in this situation.

104 The viability of aerosolized bacteria can be severely limited by atmospheric factors  
105 such as dehydration and exposure to ultraviolet (UV) light. Even inside clouds,  
106 microorganisms can still be subjected to UV, and additionally to low temperatures,  
107 freezing, and chemical stresses such as low pH and oxidizing species (Delort *et al.*, 2017).  
108 An important mean of escape from this situation may be through precipitation, which can  
109 be facilitated by the IN activity of the biological particle, as mentioned above. Both field  
110 measurements and laboratory studies have shown that cells with this activity can be  
111 preferentially precipitated from clouds in this manner, more so than non-nucleating

112 particles (Amato *et al.*, 2015; Stopelli *et al.*, 2015; Stopelli *et al.*, 2017). In this manner, ice  
113 nucleation could be a valuable feature for airborne bacteria to return to the ground and  
114 again be able to multiply and propagate.

115 In this work, two strains of *P. syringae* (pv. *syringae* and pv. *garcae*, based on  
116 Gonçalves and Massambani (2011)) were tested against simulated conditions that these  
117 bacteria would be exposed on the high atmosphere: UV and desiccation (which, indeed, can  
118 also be found on their natural plant surface habitat). The survival of the cells and their IN  
119 activity was quantified after the treatments to improve the understanding of their response  
120 to these factors in the environment. A strain of the model organism *Escherichia coli*,  
121 another Gram-negative gamma-proteobacterium like *Pseudomonas*, but non-ice nucleation  
122 active and not a common inhabitant of plant surfaces, was used for comparison.

## 123 MATERIAL AND METHODS

### 124 Strains, media, growth conditions, and survival quantification.

125 *P. syringae* cells, from the strains IBSBF 281<sup>T</sup> (= NCPPB 281, ATCC 19310; pv.  
126 *syringae*; isolated from *Syringa vulgaris*) and IBSBF 158 (pv. *garcae*; isolated *Coffea*  
127 *arabica*, where it causes the brown spot disease on leaves), were grown at 15 °C in L<sub>NP</sub>  
128 medium (MOPS, 10.46 g L<sup>-1</sup>; KCl, 1.86 g L<sup>-1</sup>; NH<sub>4</sub>Cl, 0.11 g L<sup>-1</sup>; Na<sub>2</sub>SO<sub>4</sub>, 1.42 g L<sup>-1</sup>; NaCl,  
129 0.58 g L<sup>-1</sup>; MgCl<sub>2</sub>·6H<sub>2</sub>O, 0.20 g L<sup>-1</sup>; KH<sub>2</sub>PO<sub>4</sub>, 0.014 g L<sup>-1</sup>; CaCl<sub>2</sub>, 0.011 g L<sup>-1</sup>; FeCl<sub>3</sub>·6H<sub>2</sub>O,  
130 0.0027 g L<sup>-1</sup>; sorbitol, 4 g L<sup>-1</sup>; pH 7.2) for 3 days to an OD of ~0.5. This nutrient-limited  
131 medium and cultivation conditions were chosen to allow for maximum expression of the IN  
132 phenotype (Nemecek-Marshall *et al.*, 1993). Colony-forming units (CFU) were enumerated  
133 on Difco Nutrient Agar added with 2.5% glycerol (NAG) plates incubated in the dark at 20

134 °C. *E. coli* BL21 was cultivated at 37 °C on Difco LB Broth. Cultures were grown  
135 overnight to an OD of ~5.0 in LB, and enumerated on LB agar plates incubated in the dark  
136 at 37 °C. All cell suspensions were diluted in saline solution (NaCl 0.9% w/v) prepared  
137 with ultrapure Milli-Q water (Millipore, Molsheim, France). Survival is expressed as the  
138 fraction  $N/N_0$ , where “N” is the dilution-corrected number of UFC recovered after each  
139 treatment and “ $N_0$ ” is the number of initial UFC from before the experiments. Survival  
140 fraction values are presented as means of the replicates, with error bars denoting standard  
141 deviations.

#### 142 **Quantification of ice nucleation activity.**

143 Ice nucleation activity for each sample was quantified on diluted cell suspensions  
144 placed as arrays of 32 drops of 10  $\mu$ l on top of a paraffin-coated aluminum tray. This  
145 coating was previously applied as a 2% solution of paraffin in xylene, with the solvent  
146 removed by heat over a hot plate. The tray was covered with a transparent acrylic lid sealed  
147 on the borders by a ring made of EVA foam sheet and held in place by binder clips. This set  
148 was then positioned almost totally immersed in a low temperature circulating bath (Neslab  
149 LT-50, Newington, USA) filled with 96% ethanol. Temperature was monitored with a  
150 submerged mercury thermometer. From -2 °C, the bath temperature was reduced in 1 °C  
151 stages, which were held for at least 5 minutes. At each stage, the number of frozen drops  
152 was scored. IN concentration was calculated with the following equation adapted from Vali  
153 (1971), as commonly used for microbiological studies (e.g., Joly *et al.* (2013)):  $c(T) = [\ln$   
154  $(N) - \ln (N - N(T))]$  / A, where “c(T)” is the number of cumulative active IN per cell at  
155 temperature “T”, “N” is the number of drops tested, “N(T)” is the number of frozen drops  
156 at temperature “T”, and “A” is the number of cells per drop (determined by CFU counting).

157 Measured IN activity values are presented as means of the replicates, with error bars  
158 representing standard deviations. Ice nucleation profiles across a range of temperatures for  
159 the 281 and 158 *P. syringae* strains are presented on **Figure 1**. Interestingly, the pv.  
160 *syringae* strain had a stronger measured IN activity than the pv. *garcae* strain, different to  
161 what was previously reported by Gonçalves and Massambani (2011).

## 162 **UV irradiation experiments.**

163 UV-C irradiation was done with a Philips TUV-20W low-pressure mercury lamp  
164 with main emission line at 254 nm. UV-B was provided by a set of mercury lamps (two  
165 LightTech Narrow Band UV-B 20W and one Philips TL 20W/01 RS) with main emission  
166 line at 312 nm. A solar simulator (Oriel Sol-UV-2, Bozeman, USA) with a 1000 Watt  
167 xenon arc lamp was used for the “environmental UV” irradiation experiments. This  
168 source’s output covers partially the UV-B and UV-A ranges with a spectrum similar to the  
169 one found at directly Sun-exposed environments on Earth (with negligible UV-C), except  
170 most of the visible light is removed by an optical filter. Spectra of the lamps used for these  
171 experiments can be observed in **Figure 2**. Irradiation intensities and fluences were  
172 measured by a radiometer (Vilber Loumart RMX-3W, Marne-la-Vallée, France) with  
173 photocells specific to wavelength ranges centered on 254 nm at the UV-C (CX-254), 312  
174 nm at the UV-B (CX-312), and 365 nm at the UV-A (CX-365).

175 For the UV-C and UV-B assays, cultures were diluted 100-fold in saline solution to  
176 a final volume of 8 ml in autoclaved 7 cm diameter glass petri dishes (without the lids). The  
177 samples were irradiated under orbital shaking while the fluences were monitored in real  
178 time by photocells placed next to the dishes. Aliquots taken at fluence intervals were



179 diluted and plated for survival quantification by enumeration of CFU. For the  
180 “environmental” UV experiments, the samples were irradiated on top of a frozen foam  
181 block, also under shaking, so as to control their temperature to near 0 °C. This was done  
182 during these more prolonged exposures to avoid evaporation and to prevent excessive  
183 heating – which can itself affect the cells’ IN by leading to the disaggregation of the ice  
184 nucleation protein clusters on the cells’ outer membranes (Nemecek-Marshall *et al.*, 1993).  
185 The intensities were measured beforehand as 75.5 W/m<sup>2</sup> for the UV-A and 48.7 W/m<sup>2</sup> for  
186 the UV-B, at the ranges read by the radiometer (centered on 365 and 312 nm). Aliquots  
187 from the exposed samples were then taken after determined time intervals, corresponding to  
188 UV-A and UV-B fluences which could be calculated afterwards from the intensity values.

189         Separate experiments were performed to test the effects of UV over the cells’ IN.  
190 Longer exposures were used in these assays since preliminary trials showed no effects of  
191 smaller fluences on IN activity. With the solar simulator, samples were exposed for 120  
192 minutes at the same UV intensities as before, equivalent to a total 545 kJ/m<sup>2</sup> of UV-A and  
193 348 kJ/m<sup>2</sup> of UV-B (at the ranges read by the radiometer), twice as much as the largest  
194 fluence of the survival tests. In this case, the diluted cultures were exposed as 2 ml volumes  
195 in 3 cm diameter dishes, allowing more samples to be placed below the source’s focus at  
196 the same time. The control samples, “0 min”, were aliquoted from the dishes before the  
197 beginning of the experiments and stored until the end of the irradiation when their IN  
198 activity was quantified parallel to the “120 min” samples.

199         **Desiccation experiments.**

200 Desiccation assays were performed with 10  $\mu$ l volumes taken directly from the  
201 cultures and deposited in the internal wall of horizontally positioned autoclaved 1.5 ml  
202 microcentrifuge tubes. The tubes were then placed inside sealed recipients containing either  
203 silica gel beads or water-saturated MgCl<sub>2</sub>. These treatments were used to provide controlled  
204 relative humidity (RH) values below 5% and of about 33%, respectively (Winston and  
205 Bates, 1960). A <5% RH is typical for high altitudes, considering water vapor sources at  
206 the ground surface. Hydrated controls were prepared by adding 10  $\mu$ l from the cultures to a  
207 total 1 ml in tubes with saline solution (10<sup>-2</sup> dilution). All samples were stored for 6 days  
208 inside an incubator at 20 °C. During this, the temperatures were monitored with mercury  
209 thermometers and were found to remain stable. At the end of this period, the dried samples  
210 were resuspended with 1 ml saline solution (10<sup>-2</sup> dilution in relation to the cultures). Along  
211 with the hydrated control cell suspensions, these tubes were diluted for survival  
212 determination by plating and for IN quantification. Survival was calculated relative to  
213 initial controls aliquoted from the cultures, plated before the beginning of each experiment.

## 214 RESULTS

215 The survival curves to UV-C radiation (254 nm) of *P. syringae* pv. *syringae* 281  
216 and *P. syringae* pv. *garcae* 158 were relatively similar to *E. coli*'s, though 158 was slightly  
217 more tolerant (**Figure 3**). Under our tested conditions, a fluence of 30 J/m<sup>2</sup> was enough to  
218 reduce the CFU counts of 281 to about 10% of the initial population (1 log decrease),  
219 compared to 50 J/m<sup>2</sup> for an equivalent reduction in 158.

220 For the UV-B (312 nm) assays, the observed survival of the *P. syringae* strains was  
221 considerably greater than *E. coli* (**Figure 4**). At a fluence of 5000 J/m<sup>2</sup>, *E. coli* was

222 inactivated by nearly 3 logs, while both 281 and 158 lost less than 1 log of viability.  
223 Treatment with higher fluences (up to 20000 J/m<sup>2</sup>) evidenced again a larger UV tolerance  
224 of 158 compared to 281.

225 Like the UV-B experiments, the *Pseudomonas* strains were also significantly more  
226 tolerant to irradiation with the more environmentally relevant UV range of a solar simulator  
227 when compared to *E. coli* (**Figure 5**). A 60 minute exposure, at the intensities used for the  
228 assays, did not reduce by more than 1 log the viability of 281 (32±16% survival) or 158  
229 (25±14% survival), while *E. coli* survived at only 0.2±0.1%. Interestingly, the response of  
230 both *P. syringae* strains was much more similar to the tested UV-A + UV-B fluences used  
231 for these experiments, where both curves were nearly overlapping, than for the  
232 monochromatic UV-B.

233 The IN activity of the cells at -5 °C was measured after irradiation for 120 minutes  
234 of simulated “environmental” UV (**Figure 6**). While 281 maintained its initial IN  
235 concentration, 158 presented an up to 10-fold decrease from the typical 10<sup>-2</sup>-10<sup>-1</sup> nuclei per  
236 cell of this strain at this temperature.

237 For the desiccation assays, cells were kept for 6 days inside recipients with  
238 controlled RH at 20 °C. Those results are presented on **Figure 7**. The largest tolerance was  
239 exhibited by the 158 strain at RH <5%, in which 22±8% of its initial population survived.  
240 At the same treatment, the viability of 281 was reduced by 3 to 4 logs. At RH 33%, the  
241 surviving percentage of 158 was 4±2%, about 10 times more than 281. For both tested RH  
242 (33% and <5%), *E. coli* mean survival was around 3 to 4 %. Control samples, kept hydrated

243 in saline solution during the 6-day period, remained mostly at the same initial CFU  
244 concentration, except for 281 for which the number of cells increased slightly.

245 The IN activity of the desiccated *P. syringae* strains was strikingly different (**Figure**  
246 **8**). The 281 strain presented a mean cumulative nuclei concentration of about  $3\text{-}4\times 10^{-3}$  per  
247 cell at  $-5\text{ }^{\circ}\text{C}$  after being resuspended from the RH 33% and RH  $<5\%$  treatments. Its  
248 hydrated controls remained at typical values for these cultures, at  $1.1\pm 1.0\times 10^{-1}$ . However,  
249 the IN concentrations for the 158 strain, which are normally similar to those of 281, were  
250 lower by  $10^3\text{-}10^4$  times, even for hydrated cells. Its mean measured activities (concentration  
251 per cell at  $-5\text{ }^{\circ}\text{C}$ ) were from  $1\times 10^{-4}$  to  $9\times 10^{-6}$ , after the 6-day period at  $20\text{ }^{\circ}\text{C}$ .

## 252 DISCUSSION

### 253 *P. syringae* survival after exposure to different UV ranges.

254 Both *P. syringae* strains were found to be very sensitive to UV-C, exhibiting  
255 survival comparable to the non-UV tolerant bacterium *E. coli* (**Figure 3**). Solar radiation  
256 emitted at this range ( $<280\text{ nm}$ ) does not reach Earth's lower atmosphere (the troposphere),  
257 being completely absorbed at the stratosphere. Despite that, the 254 nm wavelength  
258 produced by low-pressure mercury lamps is widely used to assess the effects of UV on  
259 bacteria in laboratory studies. It efficiently inactivates microorganisms, and, as such, is  
260 commonly referred to as "germicidal UV" (Coohill and Sagripanti, 2008). Nevertheless,  
261 some bacteria, such as *Deinococcus radiodurans*, show extreme tolerance to UV-C  
262 radiation (Slade and Radman, 2011). For comparison, a UV-C fluence of about  $1000\text{ J/m}^2$   
263 is required to inactivate 90% of its population (Pulschen *et al.*, 2015), while the highest  
264 fluence tested in this work was  $120\text{ J/m}^2$  (**Figure 3**).

265 UV-C causes the photochemical formation of dimers between adjacent pyrimidine  
266 bases on the cells' DNA. The main photoproducts generated are cyclobutane pyrimidine  
267 dimers (CPDs) and (6-4) pyrimidine-pyrimidone photoproducts (6-4 PPs), which block  
268 transcription and DNA replication with potential lethal effects for the cell (Coohill and  
269 Sagripanti, 2008). A widespread UV resistance mechanism is photorepair, where a specific  
270 enzyme, called photolyase, binds pyrimidine dimers in the cell's DNA and uses luminous  
271 energy (UV-A or visible light) to independently repair the damage. Otherwise, cells may  
272 rely on the nucleotide excision repair (NER) pathway, a multi-step (and more energetically  
273 demanding) enzymatic process that removes a patch of the lesioned strand that is  
274 subsequently resynthesized (Coohill and Sagripanti, 2008; Slade and Radman, 2011;  
275 Meador *et al.*, 2014). The organisms tested in this work all probably possess these very  
276 common repair pathways, including other relevant systems such as base excision repair  
277 (BER) and homologous recombination, which have already been characterized in *E. coli*  
278 and can be identified in *P. syringae* genomes (Feil *et al.*, 2005).

279 In addition to DNA repair, it was found that protection of cellular proteins from  
280 reactive oxygen species (ROS) generated upon exposure to UV-C is an important factor for  
281 the survival of *D. radiodurans* to this condition (Krisko and Radman, 2010; Slade and  
282 Radman, 2011). This was compared to *E. coli*, which is UV-sensitive and whose proteome  
283 is severely oxidized by UV-C. Its damaged repair machinery is prevented from correcting  
284 DNA injuries and lead, ultimately, to cell death (Krisko and Radman, 2010). In this  
285 manner, avoidance of ROS formation and effective quenching of these species represent  
286 another important UV tolerance mechanism. Still, different UV wavelengths induce distinct

287 biological effects (Santos *et al.*, 2013), which may require specific adaptations to allow the  
288 survival of the irradiated organism.

289         Covering the wavelengths between 280 and 320 nm, UV-B is the most energetic,  
290 and potentially damaging, range of solar radiation that reaches the ground, despite most of  
291 it being absorbed by the ozone layer. At higher elevations, the UV flux is increased in  
292 relation to lower altitudes, more so at the UV-B region (Blumthaler *et al.*, 1992). In  
293 agreement to that, Wang *et al.* (2014) measured a more severe DNA damage in plants at an  
294 altitude of 1700 m than at 300 m. UV-B is known to directly create DNA photoproducts,  
295 like UV-C, but is also capable of causing significant oxidative damage from ROS (Santos  
296 *et al.*, 2013). In contrast to the UV-C assays, the *P. syringae* strains were significantly more  
297 resistant to this UV range (at a wavelength of 312 nm) than *E. coli* (**Figure 4**). However, it  
298 must be recognized that all these tested organisms are still much more sensitive than *D.*  
299 *radiodurans*, for which over 120000 J/m<sup>2</sup> of UV-B is required to inactivate about 90% of  
300 its population at identical experimental conditions (Pulschen *et al.*, 2015).

301         The strain 158 (*P. syringae* pv. *garcae*) was distinctly more tolerant than 281 (*P.*  
302 *syringae* pv. *syringae*) to the UV-B treatment, more perceptible at the higher fluences  
303 tested. This evidences substantial differences between the strains (which can also be  
304 observed on the results of the other experiments discussed further below), despite both  
305 being classified as the same species. In fact, *P. syringae* pv. *garcae* can be distinguished as  
306 belonging to a separate, discrete genomospecies than *P. syringae* pv. *syringae* on the basis  
307 of DNA differences, though a lack of discerning phenotypic characteristics has prevented  
308 its reclassification with other strains within the "*P. coronafaciens*" taxon (Gardan *et al.*,  
309 1999).

310           Some *P. syringae* strains possess the error-prone DNA polymerase V encoded by  
311 the *rulAB* operon, which is responsible for translesion synthesis over damaged DNA  
312 template strands. The expression of this polymerase is induced by UV-B and confers  
313 increased resistance towards irradiation at the cost of increased mutability (Kim and  
314 Sundin, 2000). This operon is most commonly found in plasmids and its occurrence is  
315 variable within the species, even in strains of the same pathovar (Sundin and Murillo, 1999;  
316 Feil *et al.*, 2005). Its presence in the *Pseudomonas* strains tested in this work would thus  
317 have to be individually verified if this tolerance factor was to be attributed to them.

318           The UV-C and UV-B lamps used in this study are sources of narrow band radiation,  
319 much different from the continuous spectrum found in the environment (**Figure 2**). For a  
320 more accurate representation of the environmental UV, a solar simulator emitting UV-A  
321 and UV-B was used. Under these conditions, the *P. syringae* strains were much more  
322 resistant than *E. coli*, surviving about 2 logs more at the 60 minutes exposition (**Figure 5**).  
323 This can be partially seen as a consequence of the observed higher tolerance of  
324 *Pseudomonas* to the UV-B (**Figure 4**), though the presence of UV-A (320 – 400 nm) can  
325 significantly affect some organisms under this type of irradiation. For example, *D.*  
326 *radiodurans* is surprisingly sensitive to this higher wavelength fraction of the  
327 environmental UV (Slade and Radman, 2011; Pulschen *et al.*, 2015).

328           The deleterious biological effects of the UV-A range are mostly linked to ROS  
329 production, damaging, albeit indirectly, the cells' DNA, protein, and lipids (Santos *et al.*,  
330 2013). Even so, though much less efficiently than UV-B, UV-A is also able to form CPDs,  
331 and it can additionally cause the photoisomerization of 6-4 PPs into its Dewar valence  
332 isomers, another type of environmentally-relevant DNA damage (Meador *et al.*, 2014). It

333 was reported that the alternative sigma factor RpoS is an important element in the survival  
334 of *P. syringae* pv. *syringae* under natural sunlight (Miller *et al.*, 2001). Genes regulated by  
335 this protein have already been characterized in *E. coli* as involved in the cellular response to  
336 oxidative stress, including DNA repair and ROS quenching functions. Inactivation of *rpoS*  
337 lead to increased sensibility of *P. syringae* to solar UV, evidencing its important role in UV  
338 tolerance for this organism (Miller *et al.*, 2001).

339 Joly *et al.* (2015) exposed two *P. syringae* isolates collected from cloud water for 10  
340 hours to total final fluences of 85.7 kJ/m<sup>2</sup> of UV-A and 27 kJ/m<sup>2</sup> of UV-B at 5 °C. After  
341 this period, the isolates suffered virtually no viability loss. This is in agreement to the  
342 results presented on **Figure 5**, where the *Pseudomonas* strains are shown to tolerate acute  
343 expositions to considerably larger fluences than the ones used for this previous study. Still,  
344 these authors used a fluorescent lamp with a much different spectrum from the solar  
345 simulator, including a large amount of visible light. Attard *et al.* (2012) used a more similar  
346 radiation source, a 1000 Watt xenon lamp, at an total UV-A intensity of 33 W/m<sup>2</sup>.  
347 Interestingly, exposure for 42 hours, in distilled water at 17 °C, only reduced the viability  
348 of three different *P. syringae* strains by about 90% in relation to non-irradiated controls.  
349 UV-B measurements (if significant) were not provided, but the final calculated UV-A  
350 exposure was of almost 5000 kJ/m<sup>2</sup>. Possibly, this less acute UV exposition, at a lower  
351 intensity, could have improved the tolerance of the strains.

352 It is important to note that, due to differences between the UV-B lamps' line  
353 emission at 312 nm and the solar simulator broad spectrum (~290-400 nm, **Figure 2**), the  
354 biological response to both sources is not exactly equivalent. Thus, the survival curves  
355 presented for UV-B and “environmental” UV cannot be directly compared on the basis of



356 the measured fluences, considering the radiometer's probes read a spectral range, not a  
357 single wavelength.

358 Another relevant difference of the simulated environmental UV from the other  
359 assays is the possibility that the organisms may have been able to perform photorepair  
360 during the irradiations. For the UV-C and UV-B experiments, cells were exposed for a few  
361 minutes and then incubated in the dark after plating. Exposure to the solar simulator,  
362 instead, was performed for extended periods and in the presence of UV-A, which is  
363 required for the activity of the photolyase enzyme. In this manner, the cells may have been  
364 able to repair while being irradiated at least part of the received DNA damage (in the form  
365 of pyrimidine dimers from the UV-B). It is also worth remembering that the  
366 "environmental" UV experiments were carried out at low temperatures, similar to Joly *et*  
367 *al.* (2015), above a frozen foam block. This was done to prevent sample heating and  
368 excessive evaporation of the cell suspension during the prolonged irradiation. Additionally,  
369 this may better mimic the conditions of bacteria in cloud water at high elevations where  
370 lower temperatures prevail.

371 In relation to the UV-B intensity used for the "environmental" UV assays, 48.7  
372 W/m<sup>2</sup>, it is equivalent to about 5.2 times the value at an altitude of 850 m in São Paulo,  
373 Brazil (9.3 W/m<sup>2</sup>) and 3.1 times the value at an altitude of 5091 m at the Atacama Desert,  
374 Chile (15.6 W/m<sup>2</sup>), as reported in a previous paper (Pulschen *et al.*, 2015). Those  
375 measurements were performed by the same probes used for the solar simulator with a  
376 Vilber Loumart radiometer, under clear sky conditions, at noon, during summer, and at  
377 similar latitudes. Taking the UV-B as the most biologically relevant radiation range for  
378 comparison, *P. syringae* strains can be expected to tolerate hours of direct sunlight

379 exposure, even without attenuating factors such as cloud coverage and association to cell  
380 clusters, mineral particles or organic fragments. Of course, those factors can become  
381 increasingly important for survival at higher altitudes and for longer periods.

382 To test if the *Pseudomonas* culture conditions somehow favored the greater survival  
383 of these cells under the “environmental” UV, *E. coli* cultivated in L<sub>NP</sub> was also tested.  
384 Interestingly, its survival was even inferior to LB-grown cells after one hour of irradiation  
385 (**Figure S1**). In this manner, a poorer growth medium does not seem to contribute to UV  
386 tolerance.

#### 387 **Ice nucleation activity following UV irradiation.**

388 The IN activity of the cells was quantified for cells irradiated for two hours under  
389 the solar simulator, twice as long as the survival tests. Both *P. syringae* strains typically  
390 exhibited a concentration of cumulative ice nuclei per cell of  $10^{-2}$ - $10^{-1}$  at -5 °C (**Figure 1**),  
391 which was also seen for the control samples (“0 min”) for this UV assay (**Figure 6**). After  
392 the exposure, 281 cells seemed to maintain it’s measured IN activity at this range, with an  
393 even larger mean value. However, 158 suffered a decrease of up to 1 log at this  
394 temperature, though the mean IN concentration value was reduced by only about 5 times.

395 This reduction was still well above the limit of detection of the experiments, which  
396 was around  $6 \times 10^{-4}$ - $3 \times 10^{-4}$  nuclei per cell at the tested conditions (32 drops of 10 µl from a  
397  $10^{-5}$  dilution of a culture with  $5 \times 10^8$ - $1 \times 10^9$  cells/ml). Smaller dilutions, though, would equal  
398 lower detection limits (10 times lower if a  $10^{-4}$  dilution from the culture was used, for  
399 example). For the desiccation assays described below, higher cell concentrations had to be  
400 used to enable detection of fewer nuclei.

401           The three different strains of *P. syringae* irradiated by Attard *et al.* (2012) (33 W/m<sup>2</sup>  
402   of UV-A for 42 hours in distilled water at 17 °C, which led to a reduction of about 90% in  
403   viability) presented either a non-significant difference in IN activity at -5 °C or suffered a  
404   relatively small 10-fold reduction. These authors discuss how dead bacteria could maintain  
405   their IN activity as long as cell integrity is not disrupted, preserving the large ice nucleation  
406   protein aggregates on the cells' outer membranes. In fact, experiments with very large  
407   fluences of UV-C (10000 J/m<sup>2</sup>), far beyond the point where no surviving cell could be  
408   expected, also yielded no difference in 281's IN at -5 °C, and a reduction by only about 20  
409   times for 158 (**Figure S2**).

#### 410           **Survival and ice nucleation activity of desiccated cells.**

411           Strain 281 was relatively sensitive to desiccation at both tested RH (<5% and 33%),  
412   being inactivated by over 2 orders of magnitude (**Figure 7**). It survived in smaller numbers  
413   than LB-grown *E. coli*, which itself kept a viability of about 3 to 4% after those treatments.  
414   *E. coli* grown on L<sub>NP</sub> minimal medium presented a far reduced survival, with a decrease of  
415   over 3 orders of magnitude (**Figure S1**). Instead, 158 presented similar survival to LB-  
416   grown *E. coli* at an RH of 33%, and even larger at an RH below 5%, maintaining around  
417   one-fifth (mean value) of its initial population.

418           Dehydration of cells causes membrane damage, DNA strand breakage, and an  
419   increased formation of ROS from the cellular metabolism leading to protein oxidation  
420   (Mattimore and Battista, 1996; Fredrickson *et al.*, 2008). Again, like for the UV assays,  
421   DNA repair and ROS avoidance should be valuable features for bacterial survival under  
422   this condition. In the environment, tolerance to desiccation could possibly be achieved by

423 activation of the aerosolized bacteria as cloud condensation nuclei (CCN), enabling  
424 hydration of the cells from water vapor harnessed from the air. Since *Pseudomonas* were  
425 shown to be potential efficient CCN due to biosurfactant production (Ahern *et al.*, 2007;  
426 Ekström *et al.*, 2010; Renard *et al.*, 2016), this could be another survival mechanism at the  
427 disposition of these cells.

428         Despite its low tolerance to desiccation, the IN activity of 281 was relatively well  
429 preserved after this type of treatment (6 days at low RH at 20 °C, **Figure 8**). This measured  
430 decrease by roughly 30 times in IN concentration can possibly be attributed to cell  
431 membrane disruption during dehydration. Its hydrated controls seemed to maintain the full  
432 typical IN concentration per cell of this strain. In contrast, the IN activity of the more  
433 desiccation tolerant strain 158 was unexpectedly reduced even in the hydrated controls. The  
434 RH <5% samples were, in fact, slightly more active than the other treatments. The large  
435 aggregates of InaZ proteins that form at the cells outer membranes, which are essential for  
436 forming efficient IN active at relatively high temperatures such as -5 °C, are known to be  
437 particularly heat sensitive (Nemecek-Marshall *et al.*, 1993). Even though the temperature of  
438 20 °C at which the hydrated and desiccated cells were kept at during these experiments  
439 were not expected to be detrimental to biological IN (Nemecek-Marshall *et al.*, 1993),  
440 further tests with new cultures of 158 were performed at 4 °C. Survival was very similar at  
441 these conditions, only the RH 33% tolerance was slightly higher (**Figure 7, Figure**  
442 **S3**). These refrigerator-stored samples exhibited a significantly increased maintenance of IN  
443 at the hydrated control and RH 33% samples, while the RH <5% treatment remained  
444 mostly identical (**Figure 8, Figure S3**). Nevertheless, these values were still lower than the  
445 typical IN concentration for this strain, signifying some other mechanism contributes to the

446 instability of the nuclei in this case where the cells are not actively growing and their  
447 metabolism, including protein synthesis, is probably reduced.

#### 448 **CONCLUSION**

449 Bacteria potentially relevant to atmospheric phenomena due to their IN activity, *P.*  
450 *syringae* pv. *syringae* (strain 281) and *P. syringae* pv. *garcae* (strain 158), were exposed to  
451 laboratory simulations of individual conditions that aerosolized cells may face during aerial  
452 transport up to the clouds and high altitudes. The strains were relatively sensitive to  
453 irradiation by UV-C and UV-B lamps, but survived in substantial numbers exposure the  
454 UV-A + UV-B spectrum of a solar simulator for durations that may be equivalent to several  
455 hours in the environment. Ice nucleation activity at -5 °C of cell suspensions exposed to  
456 this treatment was – at least partially for the pv. *garcae* – maintained. Thus, it can be  
457 concluded that while solar radiation can be a serious limitation to the dispersal of *P.*  
458 *syringae* through the atmosphere, these bacteria are adapted to endure periods of complete  
459 exposure to sunlight, and that a relatively large subset of its population can remain capable  
460 of influencing cloud nucleation.

461 Desiccation is another major challenge that these bacteria may face on the  
462 environment. The response of the different strains to this stress varied substantially in the  
463 experiments, considering both survival and IN maintenance. Perhaps most interestingly, as  
464 observed for the pv. *garcae*, not even hydration can aid in the preservation of the IN of  
465 certain strains not actively growing for prolonged periods of time. Possibly, this could  
466 cause a decreased probability of being scavenged by precipitation for certain IN-producing

467 bacteria suspended for too long on the atmosphere. For strains like the pv. *syringae* tested,  
468 this should be less of a problem.

#### 469 **ACKNOWLEDGEMENTS**

470 This work was sponsored by CAPES, FAPESP (Project 2012/18936-0), the  
471 Microsfera project (407816/2013-5) of the Brazilian Antarctic Program (ProAntar), the  
472 Brazilian National Council of Technological and Scientific Development (CNPq  
473 424367/2016-5), INCT-Criosfera (CNPq 028306/2009), and the University of São Paulo,  
474 through the Brazilian Research Unity in Astrobiology – NAP/Astrobio. The authors would  
475 also like to thank Professor Josef Wilhelm Baader (IQ - USP) for lending the low  
476 temperature bath with which the ice nucleation experiments were performed.

#### 477 **REFERENCES**

478 Ahern, H.E., Walsh, K.A., Hill, T.C.J., and Moffett, B.F. (2007) Fluorescent pseudomonads  
479 isolated from Hebridean cloud and rain water produce biosurfactants but do not  
480 cause ice nucleation. *Biogeosciences* 4:115-124.

481 Amato, P., Joly, M., Schaupp, C., Attard, E., Möhler, O., Morris, C.E., Brunet, Y., and  
482 Delort, A.M. (2015) Survival and ice nucleation activity of bacteria as aerosols in a  
483 cloud simulation chamber. *Atmos Chem Phys* 15:6455-6465.

484 Amato, P., Parazols, M., Sancelme, M., Laj, P., Mailhot, G., and Delort, A.M. (2007)  
485 Microorganisms isolated from the water phase of tropospheric clouds at the Puy de  
486 Dôme: major groups and growth abilities at low temperatures. *Fems Microbiol Ecol*  
487 59:242-254.

- 488 Attard, E., Yang, H., Delort, A.M., Amato, P., Pöschl, U., Glaux, C., Koop, T., and Morris,  
489 C.E. (2012) Effects of atmospheric conditions on ice nucleation activity of  
490 *Pseudomonas*. *Atmos Chem Phys* 12:10667-10677.
- 491 Bauer, H., Giebl, H., Hitzenberger, R., Kasper-Giebl, A., Reischl, G., Zibuschka, F., and  
492 Puxbaum, H. (2003) Airborne bacteria as cloud condensation nuclei. *J Geophys*  
493 *Res-Atmos* 108.
- 494 Bauer, H., Kasper-Giebl, A., Loflund, M., Giebl, H., Hitzenberger, R., Zibuschka, F., and  
495 Puxbaum, H. (2002) The contribution of bacteria and fungal spores to the organic  
496 carbon content of cloud water, precipitation and aerosols. *Atmos Res* 64:109-119.
- 497 Blumthaler, M., Ambach, W., and Rehwald, W. (1992) Solar UV-A and UV-B Radiation  
498 Fluxes at 2 Alpine Stations at Different Altitudes. *Theor Appl Climatol* 46:39-44.
- 499 Burrows, S.M., Elbert, W., Lawrence, M.G., and Pöschl, U. (2009) Bacteria in the global  
500 atmosphere - Part 1: Review and synthesis of literature data for different  
501 ecosystems. *Atmos Chem Phys* 9:9263-9280.
- 502 Coohill, T.P., and Sagripanti, J.L. (2008) Overview of the inactivation by 254 nm  
503 ultraviolet radiation of bacteria with particular relevance to biodefense. *Photochem*  
504 *Photobiol* 84:1084-1090.
- 505 Delort, A.M., Väitilingom, M., Joly, M., Amato, P., Wirgot, N., Lallement, A., Sancelme,  
506 M., Matulova, M., and Deguillaume, L. (2017) Clouds: A Transient and Stressing  
507 Habitat for Microorganisms. In *Microbial Ecology of Extreme Environments*,  
508 Springer, pp 215-245.
- 509 Ekström, S., Nozière, B., Hultberg, M., Alsberg, T., Magnér, J., Nilsson, E.D., and Artaxo,  
510 P. (2010) A possible role of ground-based microorganisms on cloud formation in  
511 the atmosphere. *Biogeosciences* 7:387-394.

- 512 Feil, H., Feil, W.S., Chain, P., Larimer, F., DiBartolo, G., Copeland, A., Lykidis, A., Trong,  
513 S., Nolan, M., Goltsman, E., Thiel, J., Malfatti, S., Loper, J.E., Lapidus, A., Detter,  
514 J.C., Land, M., Richardson, P.M., Kyrpides, N.C., Ivanova, N., and Lindow, S.E.  
515 (2005) Comparison of the complete genome sequences of *Pseudomonas syringae*  
516 pv. *syringae* B728a and pv. *tomato* DC3000. *P Natl Acad Sci USA* 102:11064-  
517 11069.
- 518 Fredrickson, J.K., Li, S.M.W., Gaidamakova, E.K., Matrosova, V.Y., Zhai, M., Sulloway,  
519 H.M., Scholten, J.C., Brown, M.G., Balkwill, D.L., and Daly, M.J. (2008) Protein  
520 oxidation: key to bacterial desiccation resistance? *Isme J* 2:393-403.
- 521 Gardan, L., Shafik, H., Belouin, S., Broch, R., Grimont, F., and Grimont, P.A.D. (1999)  
522 DNA relatedness among the pathovars of *Pseudomonas syringae* and description of  
523 *Pseudomonas tremae* sp. nov. and *Pseudomonas cannabina* sp. nov. (ex Sutic and  
524 Dowson 1959). *Int J Syst Bacteriol* 49:469-478.
- 525 Gonçalves, F.L.T., and Massambani, O. (2011) Bacteria and fungal spores as ice nuclei  
526 from *Coffea arabica* L. *Rev Cien Nat* 33:73-93.
- 527 Govindarajan, A.G., and Lindow, S.E. (1988) Size of Bacterial Ice-Nucleation Sites  
528 Measured In situ by Radiation Inactivation Analysis. *P Natl Acad Sci USA* 85:1334-  
529 1338.
- 530 Green, R.L., and Warren, G.J. (1985) Physical and Functional Repetition in a Bacterial Ice  
531 Nucleation Gene. *Nature* 317:645-648.
- 532 Hallett, J., and Mossop, S.C. (1974) Production of Secondary Ice Particles during Riming  
533 Process. *Nature* 249:26-28.



- 534 Hirano, S.S., and Upper, C.D. (2000) Bacteria in the leaf ecosystem with emphasis on  
535 *Pseudomonas syringae* - a pathogen, ice nucleus, and epiphyte. *Microbiol Mol Biol*  
536 *R* 64:624-653.
- 537 Joly, M., Amato, P., Sancelme, M., Vinatier, V., Abrantes, M., Deguillaume, L., and  
538 Delort, A.M. (2015) Survival of microbial isolates from clouds toward simulated  
539 atmospheric stress factors. *Atmos Environ* 117:92-98.
- 540 Joly, M., Attard, E., Sancelme, M., Deguillaume, L., Guilbaud, C., Morris, C.E., Amato, P.,  
541 and Delort, A.M. (2013) Ice nucleation activity of bacteria isolated from cloud  
542 water. *Atmos Environ* 70:392-400.
- 543 Kim, J.J., and Sundin, G.W. (2000) Regulation of the *rulAB* mutagenic DNA repair operon  
544 of *Pseudomonas syringae* by UV-B (290 to 320 nanometers) radiation and analysis  
545 of *rulAB*-mediated mutability in vitro and in planta. *J Bacteriol* 182:6137-6144.
- 546 Krisko, A., and Radman, M. (2010) Protein damage and death by radiation in *Escherichia*  
547 *coli* and *Deinococcus radiodurans*. *P Natl Acad Sci USA* 107:14373-14377.
- 548 Lindow, S.E., Army, D.C., and Upper, C.D. (1982) Bacterial Ice Nucleation - a Factor in  
549 Frost Injury to Plants. *Plant Physiol* 70:1084-1089.
- 550 Maki, L.R., Galyan, E.L., Chang-Chien, M.M., and Caldwell, D.R. (1974) Ice Nucleation  
551 Induced by *Pseudomonas syringae*. *Appl Microbiol* 28:456-459.
- 552 Mattimore, V., and Battista, J.R. (1996) Radioresistance of *Deinococcus radiodurans*:  
553 Functions necessary to survive ionizing radiation are also necessary to survive  
554 prolonged desiccation. *J Bacteriol* 178:633-637.
- 555 Meador, J.A., Baldwin, A.J., Pakulski, J.D., Jeffrey, W.H., Mitchell, D.L., and Douki, T.  
556 (2014) The significance of the Dewar valence photoisomer as a UV radiation-

- 557 induced DNA photoproduct in marine microbial communities. *Environ Microbiol*  
558 16:1808-1820.
- 559 Miller, C.D., Mortensen, W.S., Braga, G.U.L., and Anderson, A.J. (2001) The *rpoS* gene in  
560 *Pseudomonas syringae* is important in surviving exposure to the near-UV in  
561 sunlight. *Curr Microbiol* 43:374-377.
- 562 Möhler, O., DeMott, P.J., Vali, G., and Levin, Z. (2007) Microbiology and atmospheric  
563 processes: the role of biological particles in cloud physics. *Biogeosciences* 4:1059-  
564 1071.
- 565 Morris, C.E., Conen, F., Huffman, J.A., Phillips, V., Pöschl, U., and Sands, D.C. (2014)  
566 Bioprecipitation: a feedback cycle linking Earth history, ecosystem dynamics and  
567 land use through biological ice nucleators in the atmosphere. *Global Change Biol*  
568 20:341-351.
- 569 Morris, C.E., Sands, D.C., Vinatzer, B.A., Glaux, C., Guilbaud, C., Buffière, A., Yan, S.C.,  
570 Dominguez, H., and Thompson, B.M. (2008) The life history of the plant pathogen  
571 *Pseudomonas syringae* is linked to the water cycle. *Isme J* 2:321-334.
- 572 Mülmenstädt, J., Sourdeval, O., Delanoë, J., and Quaas, J. (2015) Frequency of occurrence  
573 of rain from liquid-, mixed-, and ice-phase clouds derived from A-Train satellite  
574 retrievals. *Geophys Res Lett* 42:6502-6509.
- 575 Murray, B.J., O'Sullivan, D., Atkinson, J.D., and Webb, M.E. (2012) Ice nucleation by  
576 particles immersed in supercooled cloud droplets. *Chem Soc Rev* 41:6519-6554.
- 577 Nemecek-Marshall, M., Laduca, R., and Fall, R. (1993) High-Level Expression of Ice  
578 Nuclei in a *Pseudomonas syringae* Strain Is Induced by Nutrient Limitation and  
579 Low-Temperature. *J Bacteriol* 175:4062-4070.

- 580 Pulschen, A.A., Rodrigues, F., Duarte, R.T.D., Araujo, G.G., Santiago, I.F., Paulino-Lima,  
581 I.G., Rosa, C.A., Kato, M.J., Pellizari, V.H., and Galante, D. (2015) UV-resistant  
582 yeasts isolated from a high-altitude volcanic area on the Atacama Desert as  
583 eukaryotic models for astrobiology. *Microbiologyopen* 4:574-588.
- 584 Renard, P., Canet, I., Sancelme, M., Wirgot, N., Deguillaume, L., and Delort, A.M. (2016)  
585 Screening of cloud microorganisms isolated at the Puy de Dôme (France) station for  
586 the production of biosurfactants. *Atmos Chem Phys* 16:12347-12358.
- 587 Sands, D., Langhans, V., Scharen, A., and De Smet, G. (1982) The association between  
588 bacteria and rain and possible resultant meteorological implications. *Időjárás*  
589 86:148-152.
- 590 Šantl-Temkiv, T., Sahyoun, M., Finster, K., Hartmann, S., Augustin-Bauditz, S.,  
591 Stratmann, F., Wex, H., Clauss, T., Nielsen, N.W., Sørensen, J.H., Korsholm, U.S.,  
592 Wick, L.Y., and Karlson, U.G. (2015) Characterization of airborne ice-nucleation-  
593 active bacteria and bacterial fragments. *Atmos Environ* 109:105-117.
- 594 Santos, A.L., Oliveira, V., Baptista, I., Henriques, I., Gomes, N.C.M., Almeida, A.,  
595 Correia, A., and Cunha, A. (2013) Wavelength dependence of biological damage  
596 induced by UV radiation on bacteria. *Arch Microbiol* 195:63-74.
- 597 Slade, D., and Radman, M. (2011) Oxidative Stress Resistance in *Deinococcus*  
598 *radiodurans*. *Microbiol Mol Biol R* 75:133-191.
- 599 Stopelli, E., Conen, F., Guilbaud, C., Zopfi, J., Alewell, C., and Morris, C.E. (2017) Ice  
600 nucleators, bacterial cells and *Pseudomonas syringae* in precipitation at  
601 Jungfraujoch. *Biogeosciences* 14:1189-1196.

- 602 Stopelli, E., Conen, F., Morris, C.E., Herrmann, E., Bukowiecki, N., and Alewell, C. (2015)  
603 Ice nucleation active particles are efficiently removed by precipitating clouds. *Sci*  
604 *Rep* 5:16433.
- 605 Sundin, G.W., and Murillo, J. (1999) Functional analysis of the *Pseudomonas syringae*  
606 *ruLAB* determinant in tolerance to ultraviolet B (290–320 nm) radiation and  
607 distribution of *ruLAB* among *P. syringae* pathovars. *Environ Microbiol* 1:75-87.
- 608 Vaïtilingom, M., Attard, E., Gaiani, N., Sancelme, M., Deguillaume, L., Flossmann, A.I.,  
609 Amato, P., and Delort, A.M. (2012) Long-term features of cloud microbiology at  
610 the puy de Dôme (France). *Atmos Environ* 56:88-100.
- 611 Vali, G. (1971) Quantitative Evaluation of Experimental Results on Heterogeneous  
612 Freezing Nucleation of Supercooled Liquids. *J Atmos Sci* 28:402-&.
- 613 Wang, Q.W., Hidema, J., and Hikosaka, K. (2014) Is UV-Induced DNA Damage Greater at  
614 Higher Elevation? *Am J Bot* 101:796-802.
- 615 Wilkinson, D.M., Koumoutsaris, S., Mitchell, E.A.D., and Bey, I. (2012) Modelling the  
616 effect of size on the aerial dispersal of microorganisms. *J Biogeogr* 39:89-97.
- 617 Winston, P.W., and Bates, D.H. (1960) Saturated Solutions for the Control of Humidity in  
618 Biological Research. *Ecology* 41:232-237.

619

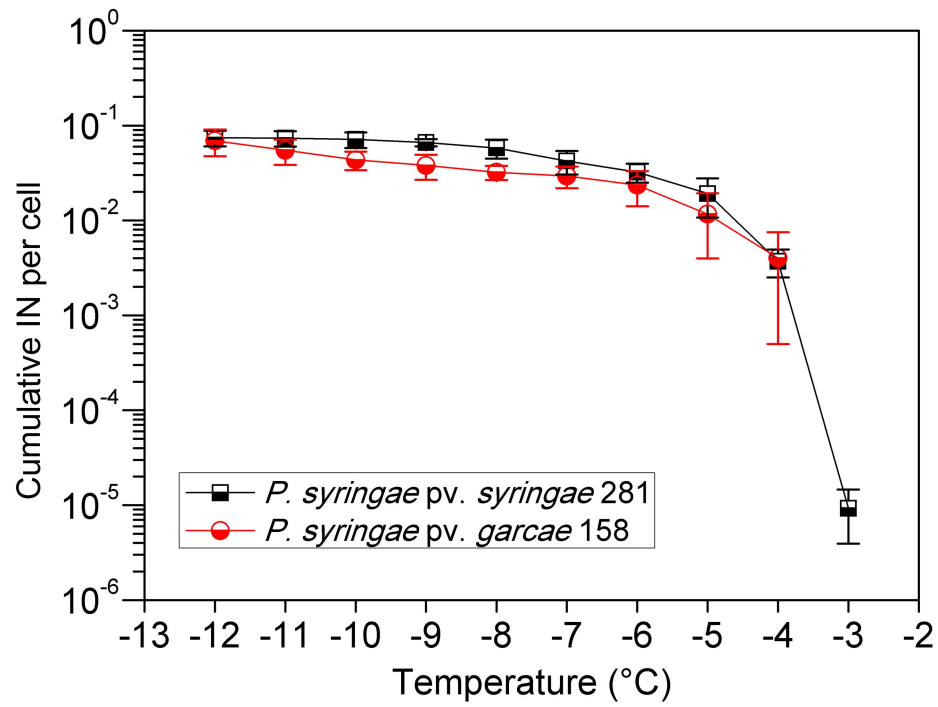

620

621 **Figure 1.** Cumulative ice nucleation spectrum of *P. syringae* pv. *syringae* 281 and *P.*

622 *syringae* pv. *garcae* 158.

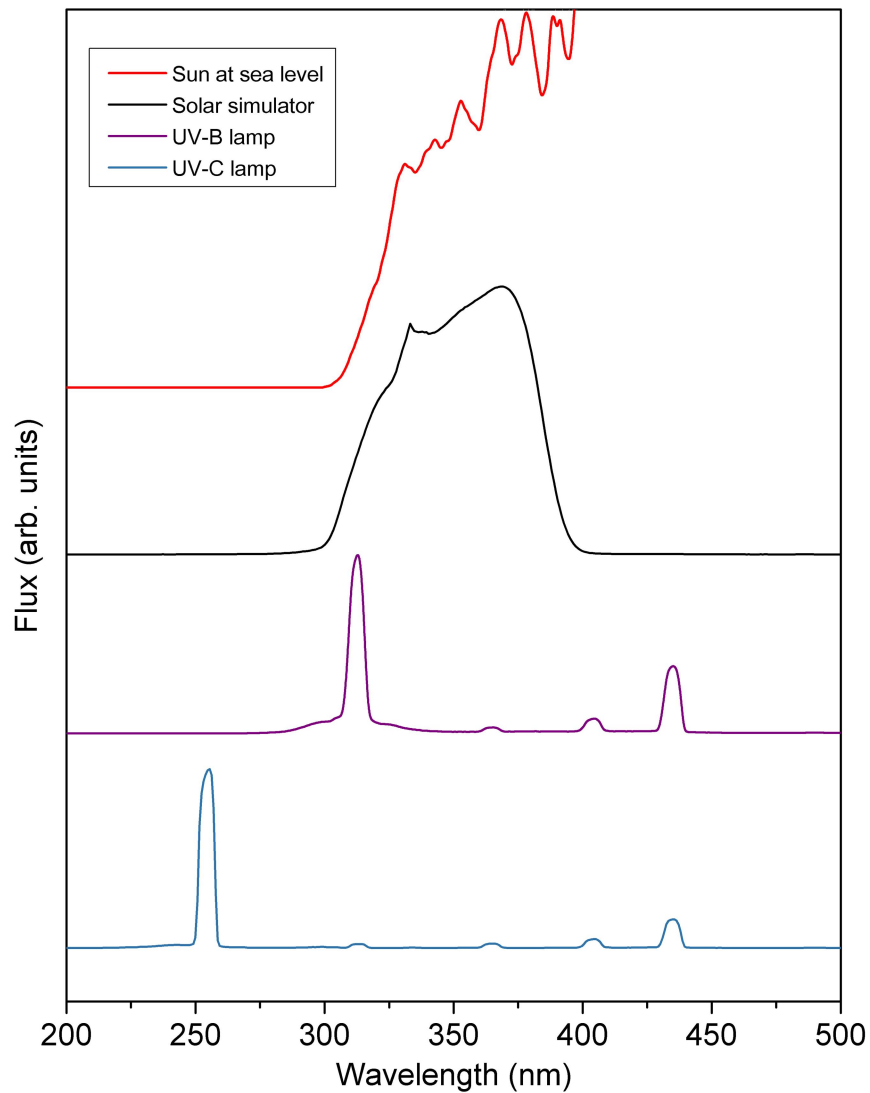

623

624 **Figure 2.** Comparison of the spectra of the lamps used for the experiments, from top to  
625 bottom (in arbitrary flux unities): of the Sun over Earth's surface (ASTM G173-03,  
626 smoothed), of the Sol-UV-2 solar simulator, and of the UV-B and UV-C lamps, measured  
627 with an Ocean Optics QE65000 spectrometer.

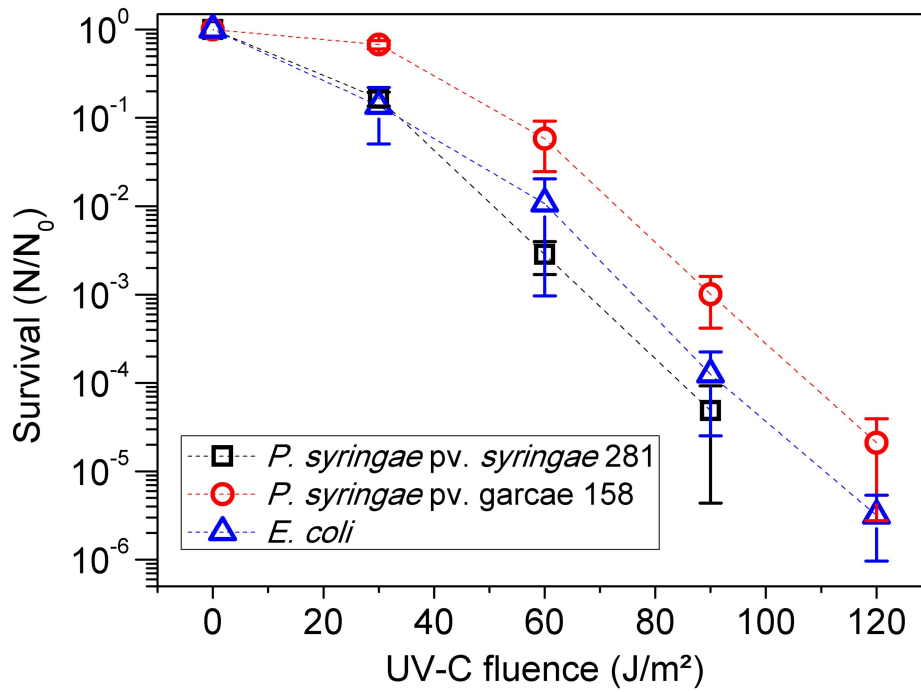

628

629 **Figure 3.** Survival curve to UV-C (254 nm) radiation of *P. syringae* pv. *syringae* 281, *P.*  
630 *syringae* pv. *garcae* 158, and *E. coli*.

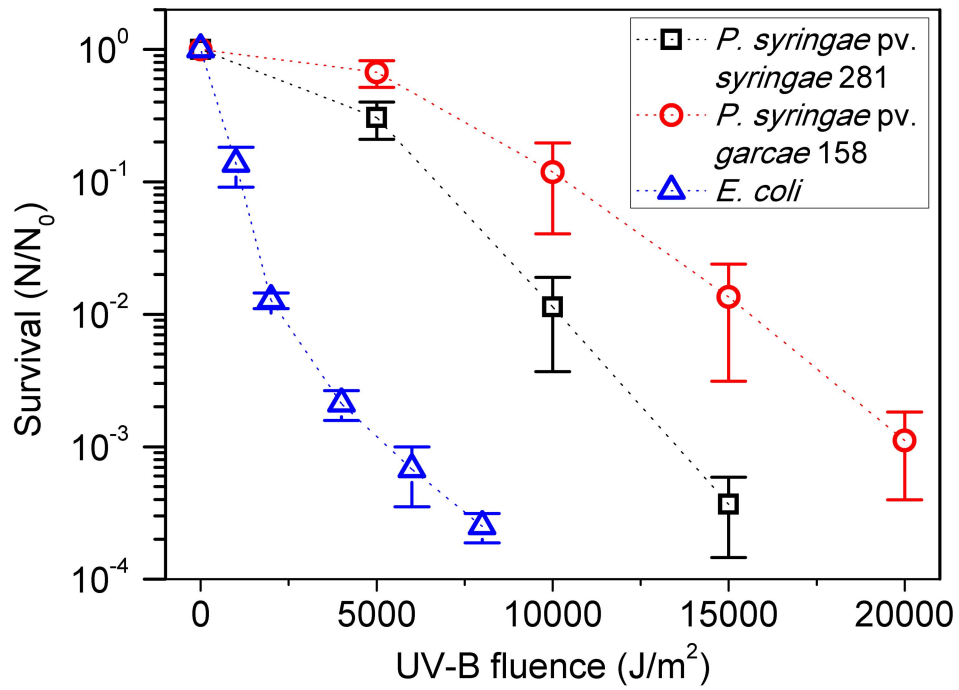

631

632 **Figure 4.** Survival curve to UV-B (312 nm) radiation of *P. syringae* pv. *syringae* 281, *P.*

633 *syringae* pv. *garcae* 158, and *E. coli*.



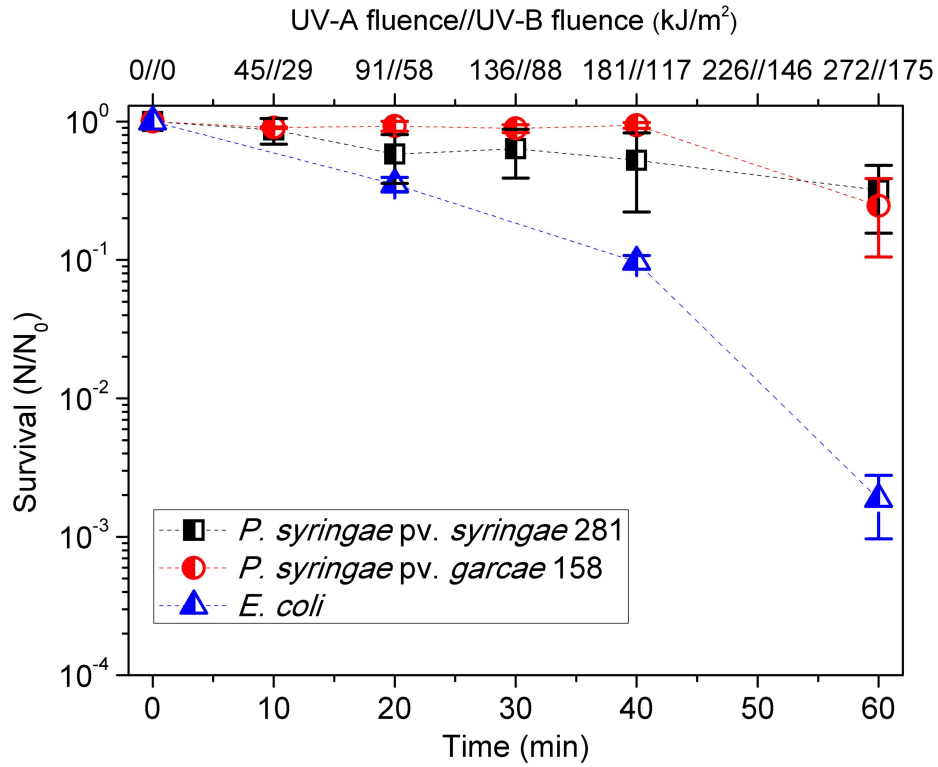

634

635 **Figure 5.** Survival curve to “environmental” UV radiation (UV-A + UV-B) of *P. syringae*

636 pv. *syringae* 281, *P. syringae* pv. *garcae* 158, and *E. coli*.

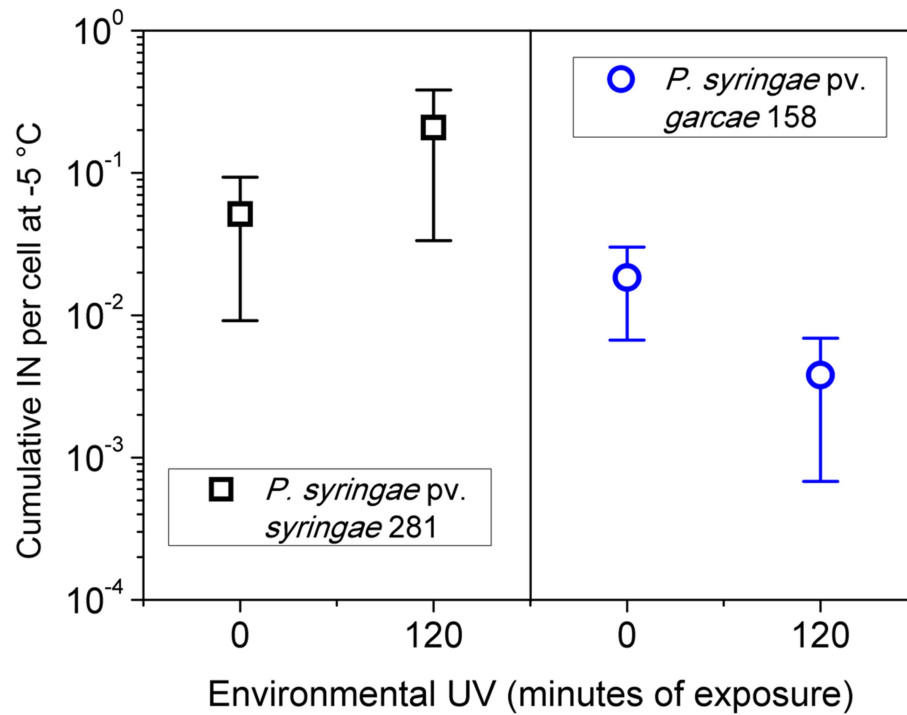

637

638 **Figure 6.** Concentration of cumulative ice nuclei per cell at -5 °C of *P. syringae* pv.  
639 *syringae* 281 and *P. syringae* pv. *garcae* 158 samples exposed for two hours to  
640 “environmental” UV radiation (UV-A + UV-B), compared to non-irradiated controls (“0  
641 min”).

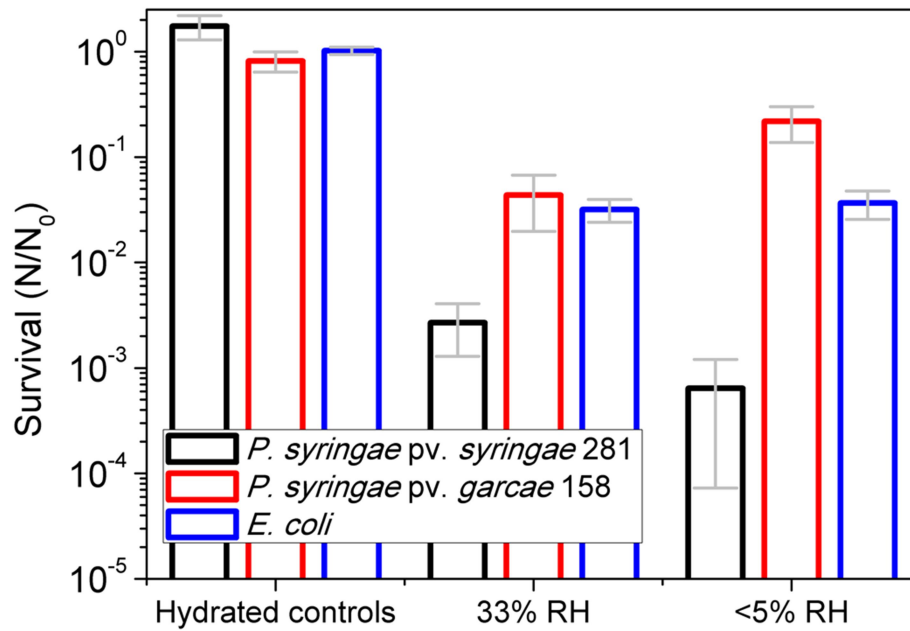

642

643 **Figure 7.** Survival of hydrated controls and samples desiccated at RH 33% and <5% for 6  
644 days at 20 °C of *P. syringae* pv. *syringae* 281, *P. syringae* pv. *garcae* 158, and *E. coli*.

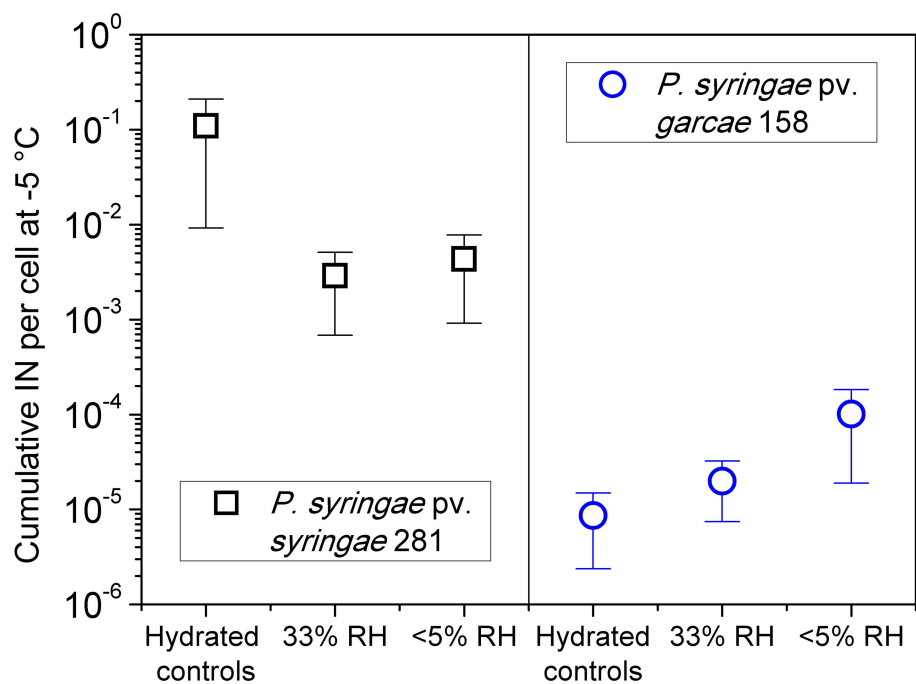

645

646 **Figure 8.** Concentration of cumulative ice nuclei per cell at -5 °C of *P. syringae* pv.  
 647 *syringae* 281 and *P. syringae* pv. *garcae* 158 samples desiccated at RH 33% and <5% for 6  
 648 days at 20 °C and their respective hydrated controls.

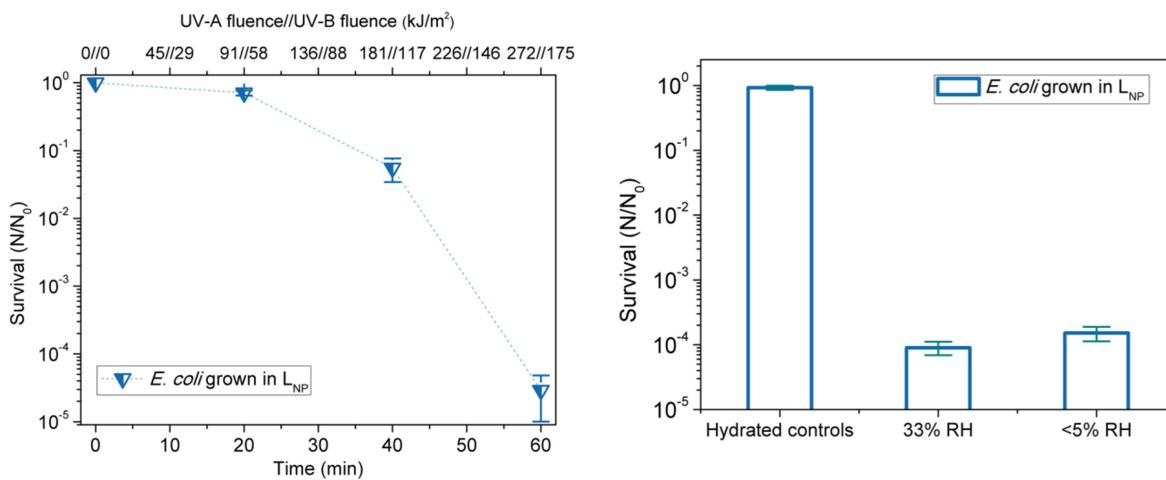

649

650 **Supplemental figure 1.** Survival of *E.coli* grown in L<sub>NP</sub> medium (overnight at 37°C to OD  
651 ~0.5) to “environmental” UV radiation (UV-A + UV-B) and to desiccation at RH 33% and  
652 <5% for 6 days at 20 °C, including its hydrated controls. Note the change in scale in the  
653 UV graph relative to **Figure 5**.

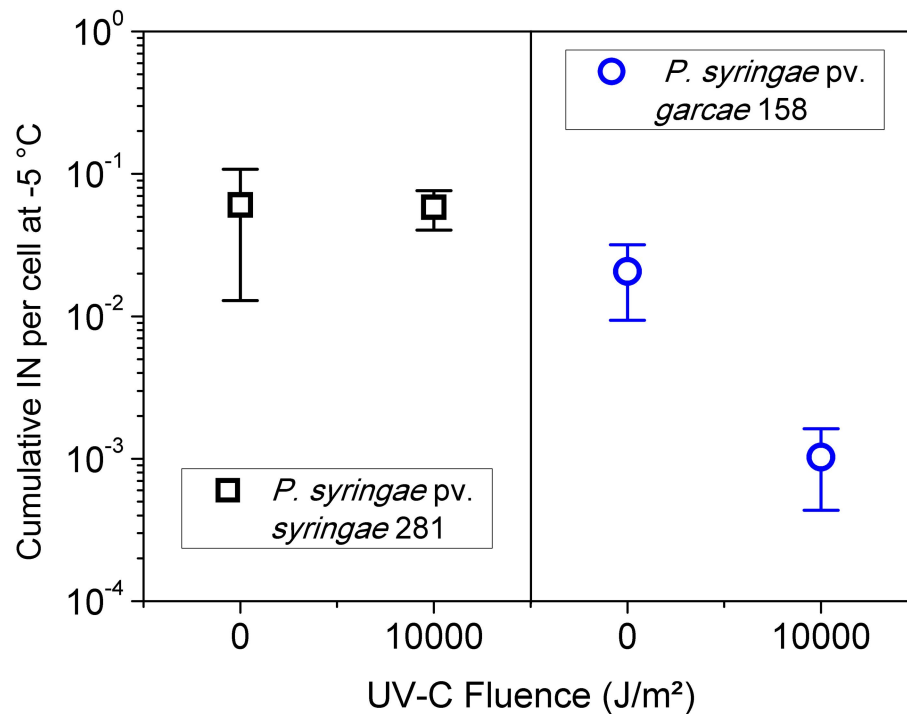

654

655 **Supplemental figure 2.** Concentration of cumulative ice nuclei per cell at -5 °C of *P.*  
656 *syringae* pv. *syringae* 281 and *P. syringae* pv. *garcae* 158 samples exposed to 10000 J/m<sup>2</sup>  
657 of UV-C (254 nm), compared to non-irradiated controls (“0 J/m<sup>2</sup>”).

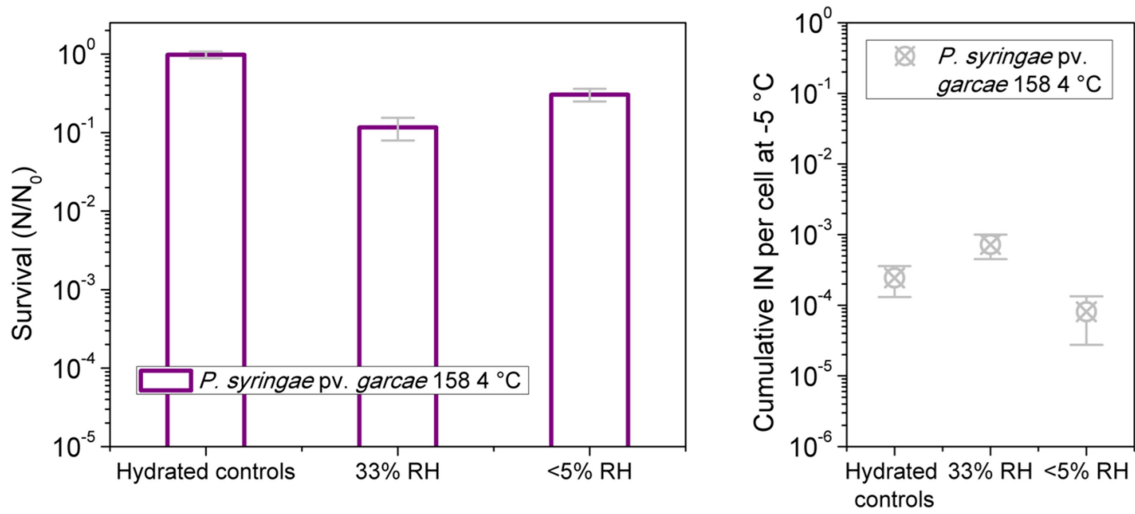

658

659 **Supplemental figure 3.** Survival and concentration of cumulative ice nuclei per cell at -5  
660 °C of *P. syringae* pv. *garcae* 158 desiccated at RH 33% and <5% for 6 days at 4 °C in a  
661 refrigerator, including its hydrated controls.
